# Supplementary material for: A novel fluorinated erythromycin antibiotic
Source: Royal Society of Chemistry journal article supplement (doi:10.1039/b506635b), 2005-01-01
Supplement: b506635b.pdf [file b506635b.pdf]

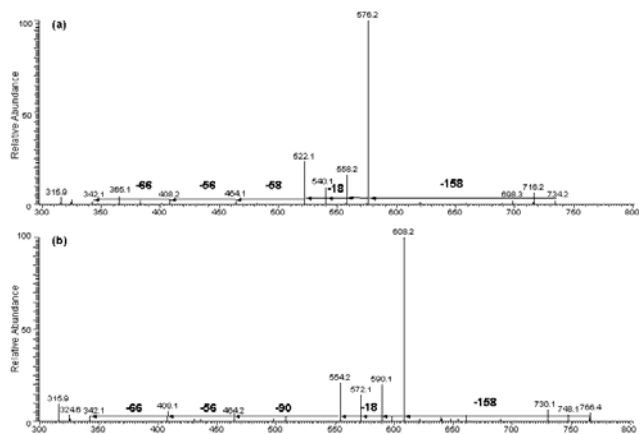

Comparison of the protonated ion MS/MS spectra of erythromycin A **1** and fluoro-erythromycin A **5**. (a) MS/MS spectrum of  $[M+H]^+$  at  $m/z$  734 of erythromycin A; (b) MS/MS spectrum of  $[M+H]^+$  at  $m/z$  766 of fluoro-erythromycin A.

The MS/MS spectrum of the  $[MH]^+$  ion of fluoro-erythromycin A exhibits the same mass losses as observed in the MS/MS of the  $[MH]^+$  ion of erythromycin A, except for the loss of starter acid: 58 Da for the loss of propionyl starter acid of erythromycin A<sup>i</sup> and 90 Da for the corresponding loss of the fluorobutyryl starter acid of fluoro-erythromycin A.

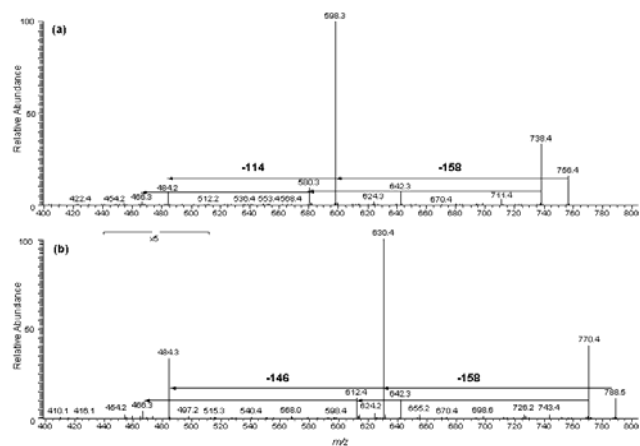

Comparison of the sodiated ion MS/MS spectra of erythromycin A **1** and fluoro-erythromycin A **5**. (a) MS/MS spectrum of  $[M+Na]^+$  at  $m/z$  756 of erythromycin A; (b) MS/MS spectrum of  $[M+Na]^+$  at  $m/z$  788 of fluoro-erythromycin A.

The MS/MS spectrum of the  $[MNa]^+$  ion of fluoro-erythromycin A exhibits the same mass losses as observed in the MS/MS of the  $[MNa]^+$  ion of erythromycin A, except for the loss of starter acid: 114 Da for the loss of propionyl starter acid of erythromycin A<sup>ii</sup> and 146 Da for the corresponding loss of the fluorobutyryl starter acid of fluoro-erythromycin A.

i P. J. Gates, G. C. Kearney, R. Jones, P. F. leadlay, J. Staunton, *Rapid Commun. Mass Spectrom.*, 1999, **13**, 242-246.  
 ii M. Roddis, P. J. Gates, Y. Roddis, J. Staunton, *J. Am. Soc. Mass Spectrom.*, 2002, **13**, 862-874.
